# Supplementary material for: Association between Cholecystectomy and the Incidence of Pancreaticobiliary Cancer after Endoscopic Choledocholithiasis Management
Source: MDPI journal article supplement (doi:10.3390/cancers16050977), 2024-02-28
Supplement: s1 [file s1]

Supplementary Table S1. Baseline characteristics among original study groups (before propensity score matching)

|                                    | Non-Cholecystectomy | Cholecystectomy | ASD   |
|------------------------------------|---------------------|-----------------|-------|
| n                                  | 33068               | 13413           |       |
| Index year                         |                     |                 | 0.031 |
| 2011,2012                          | 7592 (22.96%)       | 2915 (21.73%)   |       |
| 2013,2014                          | 8831 (26.71%)       | 3590 (26.77%)   |       |
| 2015,2016                          | 10368 (31.35%)      | 4207 (31.37%)   |       |
| 2017,2018                          | 6277 (18.98%)       | 2701 (20.14%)   |       |
| Sex                                |                     |                 | 0.029 |
| Male                               | 17856 (54.00%)      | 7071 (52.72%)   |       |
| Female                             | 15212 (46.00%)      | 6342 (47.28%)   |       |
| Age                                |                     |                 | 0.423 |
| <50                                | 5193 (15.70%)       | 3714 (27.69%)   |       |
| 50-60                              | 4753 (14.37%)       | 2512 (18.73%)   |       |
| 60-70                              | 6499 (19.65%)       | 2988 (22.28%)   |       |
| ≥70                                | 16623 (50.27%)      | 4199 (31.31%)   |       |
| <b>Urbanization</b>                |                     |                 | 0.150 |
| High urbanization                  | 8604 (26.02%)       | 3896 (29.05%)   |       |
| Moderate urbanization              | 9751 (29.49%)       | 4207 (31.37%)   |       |
| Developing town                    | 5329 (16.12%)       | 2097 (15.63%)   |       |
| General town                       | 5149 (15.57%)       | 1853 (13.81%)   |       |
| Aged town                          | 1107 (3.35%)        | 368 (2.74%)     |       |
| Agriculture town                   | 1876 (5.67%)        | 639 (4.76%)     |       |
| Village                            | 1252 (3.79%)        | 353 (2.63%)     |       |
| <b>Insured category</b>            |                     |                 | 0.219 |
| Government                         | 1755 (5.31%)        | 730 (5.44%)     |       |
| Privately held company             | 14494 (43.83%)      | 7189 (53.60%)   |       |
| Agricultural organizations         | 8125 (24.57%)       | 2391 (17.83%)   |       |
| Low-income                         | 369 (1.12%)         | 103 (0.77%)     |       |
| Non-labor force                    | 7876 (23.82%)       | 2778 (20.71%)   |       |
| Others                             | 449 (1.36%)         | 222 (1.66%)     |       |
| <b>Co-morbidity</b>                |                     |                 |       |
| Chronic hepatitis B                | 2739 (8.28%)        | 1147 (8.55%)    | 0.010 |
| Chronic hepatitis C                | 1673 (5.06%)        | 467 (3.48%)     | 0.078 |
| Helicobacter infection             | 933 (2.82%)         | 494 (3.68%)     | 0.049 |
| Diabetes mellitus                  | 12556 (37.97%)      | 4222 (31.48%)   | 0.137 |
| CKD                                | 5547 (16.77%)       | 1273 (9.49%)    | 0.217 |
| Congenital cystic disease of liver | 343 (1.04%)         | 91 (0.68%)      | 0.039 |
| Inflammatory bowel diseases        | 1072 (3.24%)        | 436 (3.25%)     | 0.001 |
| Liver cirrhosis                    | 2283 (6.90%)        | 513 (3.82%)     | 0.137 |

Supplementary Table S2. Definition of co-morbidities and study outcome.

| Variable                               | Definition by ICD-9 codes                 |
|----------------------------------------|-------------------------------------------|
| <b>Co-morbidity</b>                    | Records in NHIRD                          |
| Chronic hepatitis B                    | V02.61, 070.20, 070.22, 070.30 and 070.32 |
| Chronic hepatitis C                    | V02.62, 070.41, 070.44, 070.51 and 070.54 |
| Helicobacter infection                 | 041.86                                    |
| Diabetes mellitus                      | 250.x                                     |
| CKD                                    | 585.x                                     |
| Congenital cystic disease of liver     | 751.62, 751.69                            |
| Clonorchis and opisthorchis            | 121.0, 121.1                              |
| Inflammatory bowel diseases            | 555.x, 556.x                              |
| Liver cirrhosis                        | 571.2 571.5 571.6                         |
| <b>Outcome</b>                         | Records in cancer registry database       |
| Intrahepatic cholangiocarcinoma (ICC)  | 155.1                                     |
| Extra-hepatic cholangiocarcinoma (ECC) | 156.1                                     |
| Cholangiocarcinoma, not definite site  | 156.9                                     |
| Pancreatic cancer                      | 157.x                                     |
| Ampulla Vater cancer                   | 156.2                                     |

Supplementary Table S3. Risks of cancer incidence among patients with EST / EPBD before propensity score matching

|                             | Non-Cholecystectomy | Cholecystectomy | p value |
|-----------------------------|---------------------|-----------------|---------|
| <b>Cholangiocarcinoma</b>   |                     |                 |         |
| Observed person-years       | 114025.9            | 50481.2         |         |
| Incident cases              | 464                 | 61              |         |
| Incidence rate†             | 4.07(3.72-4.46)     | 1.21(0.94-1.55) |         |
| Crude HR (95% CI)           | Reference           | 0.31(0.23-0.40) | <.0001  |
| Adjusted HR (95% CI)        | Reference           | 0.36(0.28-0.47) | <.0001  |
| Competing aHR (95% CI)      | Reference           | 0.38(0.29-0.49) | <.0001  |
| <b>ICC</b>                  |                     |                 |         |
| Observed person-years       | 114146.3            | 50495.7         |         |
| Incident cases              | 326                 | 47              |         |
| Incidence rate†             | 2.86(2.56-3.18)     | 0.93(0.70-1.24) |         |
| Crude HR (95% CI)           | Reference           | 0.33(0.25-0.45) | <.0001  |
| Adjusted HR (95% CI)        | Reference           | 0.40(0.29-0.54) | <.0001  |
| Competing aHR (95% CI)      | Reference           | 0.42(0.31-0.57) | <.0001  |
| <b>ECC</b>                  |                     |                 |         |
| Observed person-years       | 114307.1            | 50506.3         |         |
| Incident cases              | 147                 | 24              |         |
| Incidence rate†             | 1.29(1.09-1.51)     | 0.48(0.32-0.71) |         |
| Crude HR (95% CI)           | Reference           | 0.38(0.25-0.59) | <.0001  |
| Adjusted HR (95% CI)        | Reference           | 0.46(0.30-0.71) | 0.0005  |
| Competing aHR (95% CI)      | Reference           | 0.48(0.31-0.75) | 0.0012  |
| <b>Pancreatic cancer</b>    |                     |                 |         |
| Observed person-years       | 114203.9            | 50493.3         |         |
| Incident cases              | 275                 | 61              |         |
| Incidence rate†             | 2.41(2.14-2.71)     | 1.21(0.94-1.55) |         |
| Crude HR (95% CI)           | Reference           | 0.52(0.39-0.68) | <.0001  |
| Adjusted HR (95% CI)        | Reference           | 0.56(0.43-0.75) | <.0001  |
| Competing aHR (95% CI)      | Reference           | 0.59(0.44-0.78) | 0.0003  |
| <b>Ampulla Vater cancer</b> |                     |                 |         |
| Observed person-years       | 114304.8            | 50508.4         |         |
| Incident cases              | 131                 | 15              |         |
| Incidence rate†             | 1.15(0.97-1.36)     | 0.30(0.18-0.49) |         |
| Crude HR (95% CI)           | Reference           | 0.27(0.16-0.46) | <.0001  |
| Adjusted HR (95% CI)        | Reference           | 0.30(0.18-0.51) | <.0001  |
| Competing aHR (95% CI)      | Reference           | 0.31(0.18-0.53) | <.0001  |
| <b>Lung cancer</b>          |                     |                 |         |
| Observed person-years       | 114036.3            | 50392.3         |         |
| Incident cases              | 378                 | 96              |         |
| Incidence rate†             | 3.31(3-3.67)        | 1.91(1.56-2.33) |         |
| Crude HR (95% CI)           | Reference           | 0.71(0.54-0.95) | 0.0200  |

|                        |           |                 |        |
|------------------------|-----------|-----------------|--------|
| Adjusted HR (95% CI)   | Reference | 0.91(0.69-1.21) | 0.5282 |
| Competing aHR (95% CI) | Reference | 0.99(0.74-1.32) | 0.9428 |

† per 1000 person-years

ICC, Intrahepatic cholangiocarcinoma

ECC, Extra-hepatic cholangiocarcinoma

aHR, adjusted hazard ratio, the covariates included index year, sex, age, urbanization, unit type of insured, and co-morbidities.

Competing aHR, competing adjusted hazard ratio was estimated by Fine and Gray subdistribution hazard function

Supplementary Table S4. Sensitivity analysis by moving the time 0 as +24 from index date before propensity score matching

|                      | aHR (95% CI)                                    |
|----------------------|-------------------------------------------------|
|                      | <b>Excluded patients followed &lt;24 months</b> |
| Incidence rate       |                                                 |
| Cholangiocarcinoma   | 0.34(0.21-0.56)                                 |
| ICC                  | 0.48(0.29-0.78)                                 |
| ECC                  | 0.57(0.25-1.29)                                 |
| Pancreatic cancer    | 0.70(0.50-1.28)                                 |
| Ampulla Vater cancer | 0.53(0.20-1.41)                                 |
| Lung cancer          | 1.11(0.76-1.62)                                 |

ICC, Intrahepatic cholangiocarcinoma

ECC, Extra-hepatic cholangiocarcinoma

aHR, adjusted hazard ratio, the covariates included index year, sex, age, urbanization, unit type of insured, and co-morbidities.
